# Supplementary material
Source: PubMed Central journal article supplement (PMC3921119)
Supplement: NIHMS540188-supplement-Supp_Data.pdf [file NIHMS540188-supplement-Supp_Data.pdf]

## Supplementary Online Content

Bosland MC, Kato I, Zeleniuch-Jacquotte A, et al. Effect of soy protein isolate supplementation on biochemical recurrence of prostate cancer after radical prostatectomy: a randomized trial. *JAMA*. doi:10.1001/jama.2013.7842

**eTable.** Estimates for 3-Year Recurrence (Biochemical Failure) Rates by High Risk Characteristic From the Literature and Data From NYU

This supplementary material has been provided by the authors to give readers additional information about their work.

**eTable.** Estimates for 3-Year Recurrence (Biochemical Failure) Rates by High Risk Characteristic From the Literature<sup>1</sup> and Data From NYU<sup>2</sup>

| Parameter                                     | Failure Rate (range) | Best Estimate (Subjective) | References <sup>a</sup> | NYU Data <sup>b</sup>   |
|-----------------------------------------------|----------------------|----------------------------|-------------------------|-------------------------|
| Overall failure rate (all cases) <sup>c</sup> | 15 - 36%             | 20% (median)               | 1-11, 15, 16, 18        | 8 - 12% <sup>d</sup>    |
| Preoperative PSA ≥ 20 ng/mL                   | 49 - 70%             | ~ 50%                      | 2, 4, 5, 7, 9-11, 15-18 | 56% (9/16) <sup>e</sup> |
| Positive surgical margins                     | 20 - 50%             | ~ 40% (variable)           | 1, 2, 6, 10, 12-16      | 38% (18/48)             |
| Seminal vesicle invasion                      | 40 - 57%             | ≥ 50%                      | 6, 10, 15, 16           | 57% (13/23)             |
| Extracapsular extension                       | 16 - 33%             | ~ 25%                      | 4, 6, 8, 10, 11, 15, 16 | 35% (23/65)             |
| Gleason sum ≥ 8                               | 40 - 50%             | ≥ 45%                      | 1, 2, 4-6, 8-18         | 39% (12/31)             |
| Lymph node metastases                         | 50 - 80%             | ≥ 60%                      | 2, 6, 10                | n/a                     |
| No. high risk characteristics                 |                      |                            |                         |                         |
| One or more                                   | n/a                  | n/a                        |                         | 27% (32/118)            |
| Two or more                                   | n/a                  | n/a                        |                         | 47% (22/47)             |
| One                                           | n/a                  | n/a                        |                         | 14% (10/71)             |
| Two                                           | n/a                  | n/a                        |                         | 41% (12/29)             |
| Three                                         | n/a                  | n/a                        |                         | 58% (7/12)              |
| Four                                          | n/a                  | n/a                        |                         | 50% (3/6)               |

<sup>a</sup> The estimates were derived by review in 1997 and again in 2003 from references 1-18. A PSA cut-off at 0.1-0.2 ng/mL was used to determine recurrence at NYU and in the reviewed literature. The initial estimate in 1997 of the recurrence rate was 40%, which lowered in 2003 to 30% and the sample size adjusted to maintain the same statistical power.

<sup>b</sup> For the period 1997-2001 (n = 690).

<sup>c</sup> This includes both cases with high risk of recurrence and low risk cases.

<sup>d</sup> 11.6% (53/455) for the period 1997-1999 and 7.7% (18/235) for the period 2000-2001.

<sup>e</sup> In parentheses is the number of recurrence cases over the number of participants with that characteristic. n/a = not available or not applicable.

#### References

- Haese A, Huland E, Graefen M, Hammerer P, Noldus J, Huland H. Ultrasensitive detection of prostate specific antigen in the followup of 422 patients after radical prostatectomy. *J Urol.* 1999;161(4):1206-1211.
- Graefen M, Noldus J, Pichlmeier U, et al. Early prostate-specific antigen relapse after radical retropubic prostatectomy: prediction on the basis of preoperative and postoperative tumor characteristics. *Eur Urol.* 1999;36(1):21-30.
- Han M, Partin AW, Piantadosi S, Epstein JI, Walsh PC. Era specific biochemical recurrence-free survival following radical prostatectomy for clinically localized prostate cancer. *J Urol.* 2001;166(2):416-419.
- Han M, Partin AW, Zahurak M, Piantadosi S, Epstein JI, Walsh PC. Biochemical (prostate specific antigen) recurrence probability following radical prostatectomy for clinically localized prostate cancer. *J Urol.* 2003;169(2):517-523.
- Partin AW, Piantadosi S, Sanda MG, et al. Selection of men at high risk for disease recurrence for experimental adjuvant therapy following radical prostatectomy. *Urol.* 1995;45(5):831-838.
- Roberts WW, Bergstralh EJ, Blute ML, et al. Contemporary identification of patients at high risk of early prostate cancer recurrence after radical retropubic prostatectomy. *Urol.* 2001;57(6):1033-1037.
- D'Amico AV, Whittington R, Malkowicz SB, Schultz D. A method for determining a prostate-specific antigen cure after radiation therapy for clinically localized prostate cancer. *Int J Rad Oncol Biol Phys.* 1995;32(2):473-477.
- Ohori M, Goad JR, Wheeler TM, Eastham JA, Thompson TC, Scardino PT. Can radical prostatectomy alter the progression of poorly differentiated prostate cancer? *J Urol.* 1994;152(5 Pt 2):1843-1849.
- Catalona WJ, Smith DS. Cancer recurrence and survival rates after anatomic radical retropubic prostatectomy for prostate cancer: intermediate-term results. *J Urol.* 1998;160(6 pt 2):2428-2434.
- Kattan MW, Wheeler TM, Scardino PT. Postoperative nomogram for disease recurrence after radical prostatectomy for prostate cancer. *J Clin Oncol.* 1999;17(5):1499-1507.
- Bauer JJ, Connelly RR, Sesterhenn IA, et al. Biostatistical modeling using traditional variables and genetic biomarkers for predicting the risk of prostate carcinoma recurrence after radical prostatectomy. *Cancer.* 1997;79(5):952-962.
- Grossfeld GD, Chang JJ, Broering JM, et al. Does the completeness of prostate sampling predict outcome for patients undergoing radical prostatectomy?: data from the CAPSURE database. *Urology.* 2000;56(3):430-435.
- Cheng L, Darson MF, Bergstralh EJ, Slezak J, Myers RP, Bostwick DG. Correlation of margin status and extraprostatic extension with progression of prostate carcinoma. *Cancer.* 1999;86(9):1775-1782.
- Tefilli MV, Gheiler EL, Tiguert R, et al. Prognostic indicators in patients with seminal vesicle involvement following radical prostatectomy for clinically localized prostate cancer. *J Urol.* 1998;160(3 Pt 1):802-806.
- Sofer M, Savoie M, Kim SS, Civantos F, Soloway MS. Biochemical and pathological predictors of the recurrence of prostatic adenocarcinoma with seminal vesicle invasion. *J Urol.* 2003;169(1):153-156.
- Amling CL, Blute ML, Bergstralh EJ, Seay TM, Slezak J, Zincke H. Long-term hazard of progression after radical prostatectomy for clinically localized prostate cancer: continued risk of biochemical failure after 5 years. *J Urol.* 2000;164(1):101-105.
- Kupelian PA, Buchsbaum JC, Elshaikh M, Reddy CA, Zippe C, Klein EA. Factors affecting recurrence rates after prostatectomy or radiotherapy in localized prostate carcinoma patients with biopsy Gleason score 8 or above. *Cancer.* 2002;95(11):2302-2307.
- Mian BM, Troncoso P, Okihara K, et al. Outcome of patients with Gleason score 8 or higher prostate cancer following radical prostatectomy alone. *J Urol.* 2002;167(4):1675-1680.
